# Supplementary material for: Prognostic role of carcinoembryonic antigen and carbohydrate antigen 19-9 in metastatic colorectal cancer: a BRAF-mutant subset with high CA 19-9 level and poor outcome
Source: PubMed Central journal article supplement (PMC6008450; doi:10.1038/s41416-018-0115-9), 2018-06-06

**Figure S1.** Overall survival (OS) in 545 patients with serum samples analysed for CA 19-9.

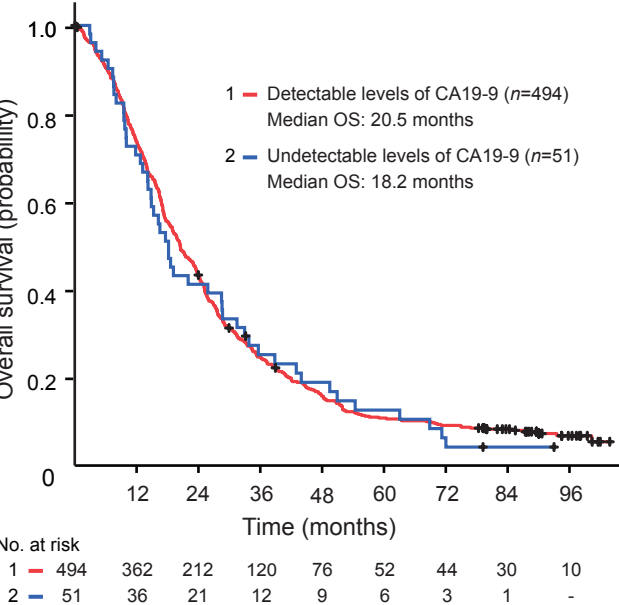

Supplement: 41416_2018_115_MOESM1_ESM.pdf [file 41416_2018_115_MOESM1_ESM.pdf]
