# Supplementary material for: Prognostic role of carcinoembryonic antigen and carbohydrate antigen 19-9 in metastatic colorectal cancer: a BRAF-mutant subset with high CA 19-9 level and poor outcome
Source: PubMed Central journal article supplement (PMC6008450; doi:10.1038/s41416-018-0115-9), 2018-06-06
Supplement: 41416_2018_115_MOESM2_ESM.pdf [file 41416_2018_115_MOESM2_ESM.pdf]

| Table S1. Serum level of CEA and CA 19-9 and clinical patient characteristics |                    |           |                       |           |  |
|-------------------------------------------------------------------------------|--------------------|-----------|-----------------------|-----------|--|
| Variables                                                                     | Serum level of CEA |           | Serum level of CA19-9 |           |  |
|                                                                               | (n=545)            |           | (n=494)               |           |  |
|                                                                               | <5 µg/L            | ≥5 µg/L   | <35 kU/L              | ≥35 kU/L  |  |
|                                                                               | n (%)              | n (%)     | n (%)                 | n (%)     |  |
| <b>WHO performance status</b>                                                 |                    |           |                       |           |  |
| 0                                                                             | 83 (23)            | 284 (77)  | 148 (45)              | 180 (55)  |  |
| 1                                                                             | 11 (7)             | 144 (93)  | 38 (26)               | 107 (74)  |  |
| 2                                                                             | 2 (9)              | 21 (91)   | 2 (10)                | 19 (90)   |  |
| <b>Origin of primary tumour</b>                                               |                    |           |                       |           |  |
| Colon                                                                         | 59 (18)            | 262 (82)  | 105 (35)              | 192 (65)  |  |
| Rectum                                                                        | 37 (17)            | 187 (84)  | 83 (42)               | 114 (58)  |  |
| <b>Surgery of primary tumour</b>                                              |                    |           |                       |           |  |
| Resected                                                                      | 79 (21)            | 290 (79)  | 147 (44)              | 187 (56)  |  |
| Not resected                                                                  | 17 (10)            | 159 (90)  | 41 (26)               | 119 (74)  |  |
| <b>Time of metastases</b>                                                     |                    |           |                       |           |  |
| Synchronous                                                                   | 60 (15)            | 329 (85)  | 109 (31)              | 238 (69)  |  |
| Metachronous                                                                  | 36 (23)            | 120 (77)  | 79 (54)               | 68 (46)   |  |
| <b>Type of metastases</b>                                                     |                    |           |                       |           |  |
| Liver-only                                                                    | 14 (14)            | 88 (86)   | 33 (37)               | 56 (63)   |  |
| Lung-only                                                                     | 8 (33)             | 16 (67)   | 15 (71)               | 6 (29)    |  |
| Other-sites-only                                                              | 6 (21)             | 23 (79)   | 12 (44)               | 15 (56)   |  |
| Multiple sites                                                                | 68 (17)            | 322 (83)  | 128 (36)              | 229 (64)  |  |
| <b>Alkaline phosphatase level</b>                                             |                    |           |                       |           |  |
| Normal                                                                        | 76 (27)            | 210 (73)  | 132 (51)              | 126 (49)  |  |
| > UNL                                                                         | 20 (8)             | 239 (92)  | 56 (24)               | 180 (76)  |  |
| <b>Platelet count</b>                                                         |                    |           |                       |           |  |
| ≤400/nL                                                                       | 77 (20)            | 306 (80)  | 142 (41)              | 205 (59)  |  |
| >400/nL                                                                       | 19 (12)            | 143 (88)  | 46 (31)               | 101 (69)  |  |
| <b>White blood cell count</b>                                                 |                    |           |                       |           |  |
| ≤10/nL                                                                        | 87 (21)            | 326 (79)  | 161 (44)              | 208 (56)  |  |
| >10/nL                                                                        | 9 (7)              | 123 (93)  | 27 (22)               | 98 (78)   |  |
| <b>RAS/BRAF mutation status</b>                                               |                    |           |                       |           |  |
| <i>RAS/BRAF</i> wild-type                                                     | 27* (15)           | 159* (85) | 72† (42)              | 99‡ (58)  |  |
| <i>RAS</i> mutation                                                           | 40* (20)           | 161* (80) | 65† (36)              | 114‡ (64) |  |
| <i>BRAF</i> mutation                                                          | 18* (34)           | 35* (66)  | 18† (37)              | 31‡ (63)  |  |
| <b>CRP level</b>                                                              |                    |           |                       |           |  |
| ≤10 mg/L                                                                      | 55† (28)           | 139† (72) | 91§ (52)              | 85§ (48)  |  |
| >10 mg/L                                                                      | 27† (12)           | 207† (88) | 63§ (30)              | 149§ (70) |  |

Abbreviations: CRP, C-reactive protein; UNL, Upper normal limit; WHO, World Health Organization.  
\*Analysed for *RAS/BRAF* mutations (n=440), †CRP (n=428), ‡*RAS/BRAF* mutations (n=399), §CRP (n=388).
