# Supplementary material for: Prognostic role of carcinoembryonic antigen and carbohydrate antigen 19-9 in metastatic colorectal cancer: a BRAF-mutant subset with high CA 19-9 level and poor outcome
Source: PubMed Central journal article supplement (PMC6008450; doi:10.1038/s41416-018-0115-9), 2018-06-06
Supplement: 41416_2018_115_MOESM6_ESM.pdf [file 41416_2018_115_MOESM6_ESM.pdf]

**Table S5. Relationship between best response and changes in serum level of CEA and CA 19-9 before start of treatment to cycle 4 (8 weeks of treatment) in patients with elevated CEA ( $\geq 5\mu\text{g/L}$ ) or CA 19-9 ( $\geq 35\text{ kU/L}$ ) at baseline**

| Patients with baseline<br>CEA $\geq 5\ \mu\text{g/L}$<br>( <i>n</i> =384) |              | Change in serum<br>level of CEA |              | Patients with baseline<br>CA 19-9 $\geq 35\ \text{kU/L}$<br>( <i>n</i> =260) |              | Change in serum level<br>of CA 19-9 |              |
|---------------------------------------------------------------------------|--------------|---------------------------------|--------------|------------------------------------------------------------------------------|--------------|-------------------------------------|--------------|
|                                                                           |              | Drop                            | Rise         |                                                                              |              | Drop                                | Rise         |
| Clinical response                                                         | <i>n</i> (%) | <i>n</i> (%)                    | <i>n</i> (%) | Clinical response                                                            | <i>n</i> (%) | <i>n</i> (%)                        | <i>n</i> (%) |
| <b>CR+PR</b>                                                              | 187 (49)     | 177 (95)                        | 10 (5)       | <b>CR+PR</b>                                                                 | 130 (50)     | 124 (95)                            | 6 (5)        |
| <b>SD</b>                                                                 | 170 (44)     | 128 (75)                        | 42 (25)      | <b>SD</b>                                                                    | 110 (42)     | 87 (79)                             | 23 (21)      |
| <b>PD</b>                                                                 | 20 (5)       | 6 (30)                          | 14 (70)      | <b>PD</b>                                                                    | 16 (6)       | 8 (50)                              | 8 (50)       |
| <b>NE</b>                                                                 | 7 (2)        |                                 |              | <b>NE</b>                                                                    | 4 (2)        |                                     |              |

Abbreviations: CR, Complete response; NE, Not evaluable; PD, Progressive disease; PR, Partial response; SD, Stable disease.
